# Supplementary material for: Diversity of physical properties of bacterial extracellular membrane vesicles revealed through atomic force microscopy phase imaging
Source: Royal Society of Chemistry journal article supplement (doi:10.1039/c9nr10850e), 2020-01-01
Supplement: c9nr10850e2.pdf [file c9nr10850e2.pdf]

## Supplemental information for:

### Diversity of physical properties of bacterial extracellular membrane vesicles revealed through atomic force microscopy phase imaging

Yousuke Kikuchi,<sup>a</sup> Nozomu Obana,<sup>b,c</sup> Masanori Toyofuku,<sup>c,d</sup> Noriyuki Kodera,<sup>e</sup> Takamitsu Soma,<sup>f</sup> Toshio Ando,<sup>e</sup> Yoshihiro Fukumori,<sup>e,g</sup> Nobuhiko Nomura<sup>\*c,d</sup> Azuma Taoka<sup>\*a,e</sup>

<sup>a</sup>*Institute of Science and Engineering, Kanazawa university, Kakuma-machi, Kanazawa, Ishikawa 920-1192, Japan*

<sup>b</sup>*Transborder Medical Research Center, Faculty of Medicine, University of Tsukuba, 1-1-1 Tennodai, Tsukuba, Ibaraki 305-8572, Japan*

<sup>c</sup>*Microbiology Research Center for Sustainability (MiCS), University of Tsukuba, 1-1-1 Tennoudai, Tsukuba, Ibaraki 305-8572, Japan*

<sup>d</sup>*Faculty of Life and Environmental Sciences, University of Tsukuba, 1-1-1 Tennodai, Tsukuba, TARA center, Ibaraki 305-8572, Japan*

<sup>e</sup>*Nano Life Science Institute (WPI-NanoLSI), Kanazawa University, Kakuma-machi, Kanazawa, Ishikawa 920-1192, Japan*

<sup>f</sup>*Graduate School of Life and Environmental Sciences, University of Tsukuba, 1-1-1 Tennodai, Tsukuba, Ibaraki 305-8572, Japan*

<sup>g</sup>*Vice President, Kanazawa University, Kakuma-machi, Kanazawa, Ishikawa 920-1192, Japan*

\*To whom correspondence should be addressed at [nomura.nobuhiko.ge@u.tsukuba.ac.jp](mailto:nomura.nobuhiko.ge@u.tsukuba.ac.jp), [aztaoka@staff.kanazawa-u.ac.jp](mailto:aztaoka@staff.kanazawa-u.ac.jp)

## Contents

### Supplemental movie 1

**Movie S1** AFM phase imaging of *P. aeruginosa* MVs for 60 s. AFM images were recorded at imaging rates of 0.5 s/frame and 100 × 100 pixels.

### Supplemental figure 1-7

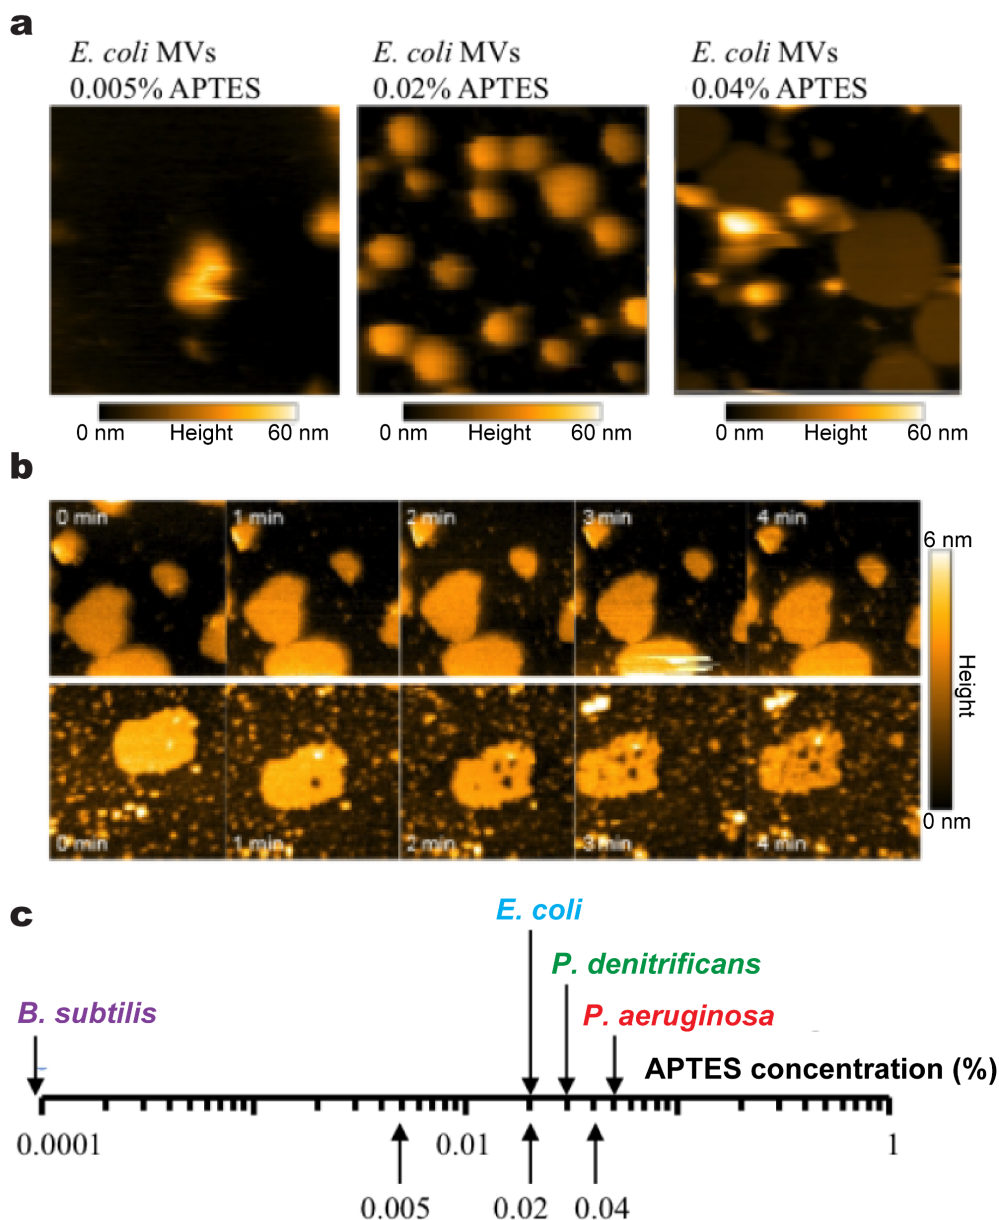

**Figure S1** Adsorption of MVs on mica substrate. (a) *E. coli* MVs were immobilized on mica surfaces silanized by APTES concentrations of 0.005% (insufficient concentration), 0.02% (optimized concentration), and 0.04% (excess concentration). (b) Time-lapse still images of sheet-like *E. coli* MVs on the mica substrate treated with 0.04% APTES. Addition of 0.1% Triton X-100 surfactant into the imaging chamber at 0 min (lower images) or no addition (upper images). After adding surfactant, the sheet-like structure dissolved. (c) The optimal APTES concentrations for observing *E. coli*, *P. aeruginosa*, *P. denitrificans*, and *B. subtilis* MVs were 0.02%, 0.05%, 0.03%, and 0.0001%, respectively. AFM images were recorded at imaging rates of (a) 2.0 s/frame and  $200 \times 200$  pixels or (d) 0.5 s/frame and  $100 \times 100$  pixels.

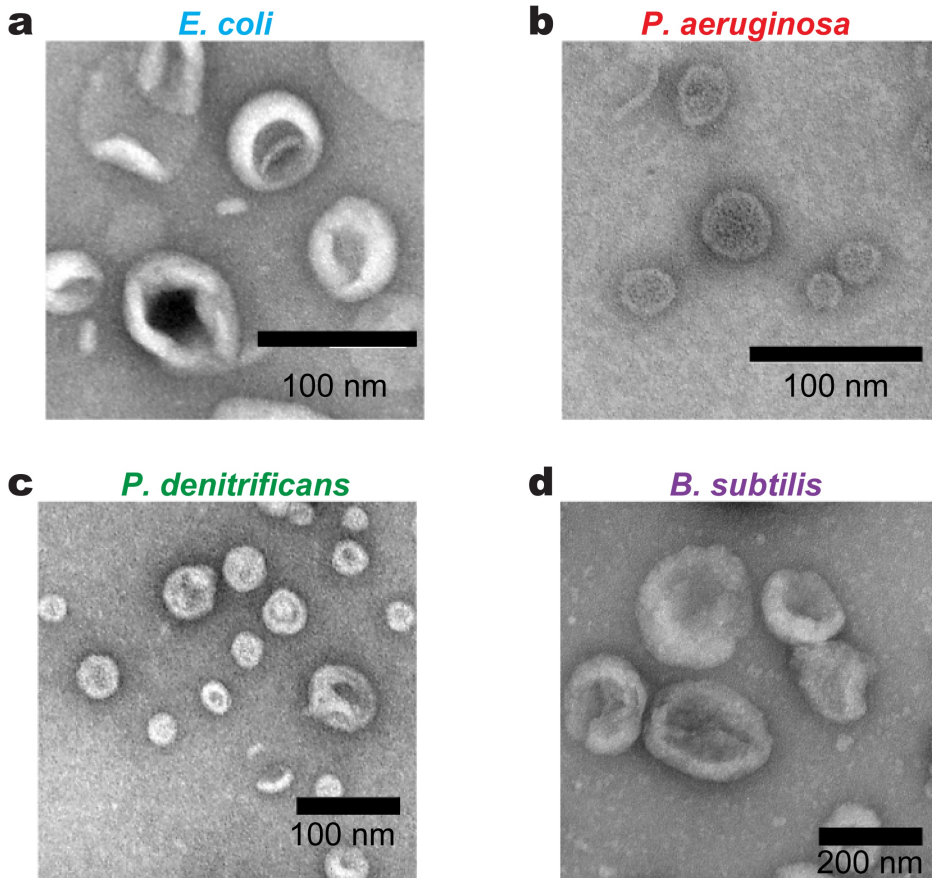

**Figure S2** TEM images of negative-stained MVs. TEM images of (a) *E. coli*, (b) *P. aeruginosa*, (c) *P. denitrificans*, and (d) *B. subtilis* MVs.

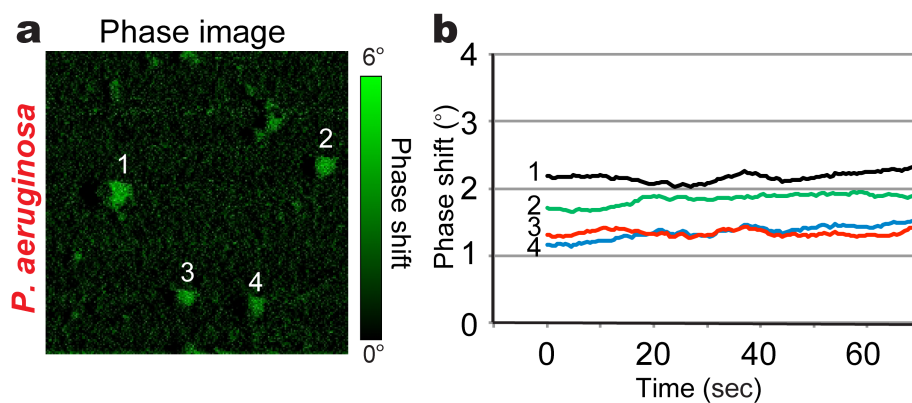

**Figure S3** Assessment of phase-shift degree of *P. aeruginosa* MVs over 60 s. (a) Phase images of *P. aeruginosa* MVs. Four MVs (1–4) recorded for 60 s at imaging rates of 0.5 s/frame and  $100 \times 100$  pixels. (b) Time series of phase-shift degree at the tops of the four MVs (1–4).

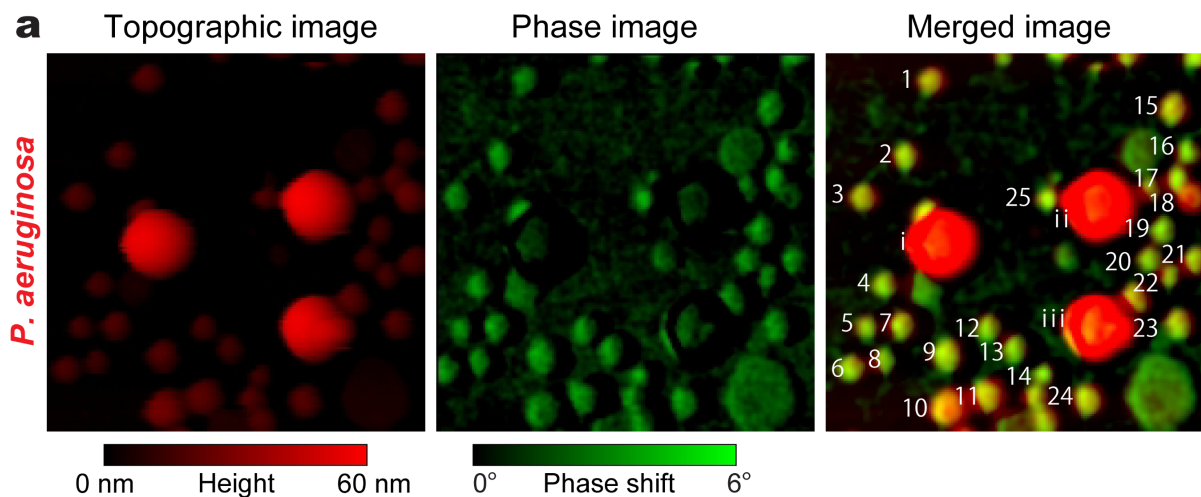

**b**

| MVs | $\varphi$ (degree) | $\varphi_{cal}$ | MVs | $\varphi$ (degree) | $\varphi_{cal}$ | MVs   | $\varphi$ (degree) | $\varphi_{cal}$ |
|-----|--------------------|-----------------|-----|--------------------|-----------------|-------|--------------------|-----------------|
| 1   | 3.0                | 2.3             | 11  | 2.2                | 1.6             | 21    | 2.7                | 2.8             |
| 2   | 1.6                | 1.2             | 12  | 4.0                | 3.0             | 22    | 2.0                | 1.3             |
| 3   | 2.0                | 1.5             | 13  | 3.6                | 2.7             | 23    | 2.3                | 1.9             |
| 4   | 2.4                | 1.8             | 14  | 3.4                | 2.5             | 24    | 3.2                | 1.6             |
| 5   | 2.6                | 2.0             | 15  | 2.8                | 2.1             | 25    | 1.6                | 1.6             |
| 6   | 2.0                | 1.4             | 16  | 3.0                | 2.2             | Beads | $\varphi$ (degree) | $\varphi_{cal}$ |
| 7   | 2.6                | 1.9             | 17  | 3.8                | 2.9             | i     | 1.3                | 1.0             |
| 8   | 3.0                | 2.3             | 18  | 1.8                | 1.3             | ii    | 1.4                | 1.1             |
| 9   | 3.2                | 2.4             | 19  | 2.2                | 1.7             | iii   | 1.3                | 1.0             |
| 10  | 2.8                | 2.0             | 20  | 2.6                | 1.9             |       |                    |                 |

**Figure S4** Normalization of phase-shift degree. (a) AFM topographic image, phase image, and merged image of the mixture of *P. aeruginosa* MVs and polystyrene beads. (b) Obtained and normalized phase-shift values ( $\phi_{cal}$ ) of *P. aeruginosa* MVs (1–25) and polystyrene beads (i–iii) from panel a.  $\phi_{cal}$  is the quotient of the phase-shift degree of MV particles ( $\phi_{MV}$ ) and the averaged phase-shift value of polystyrene beads ( $\phi_{bead}$ ). AFM images were recorded at imaging rates of 2.0 s/frame and  $200 \times 200$  pixels.

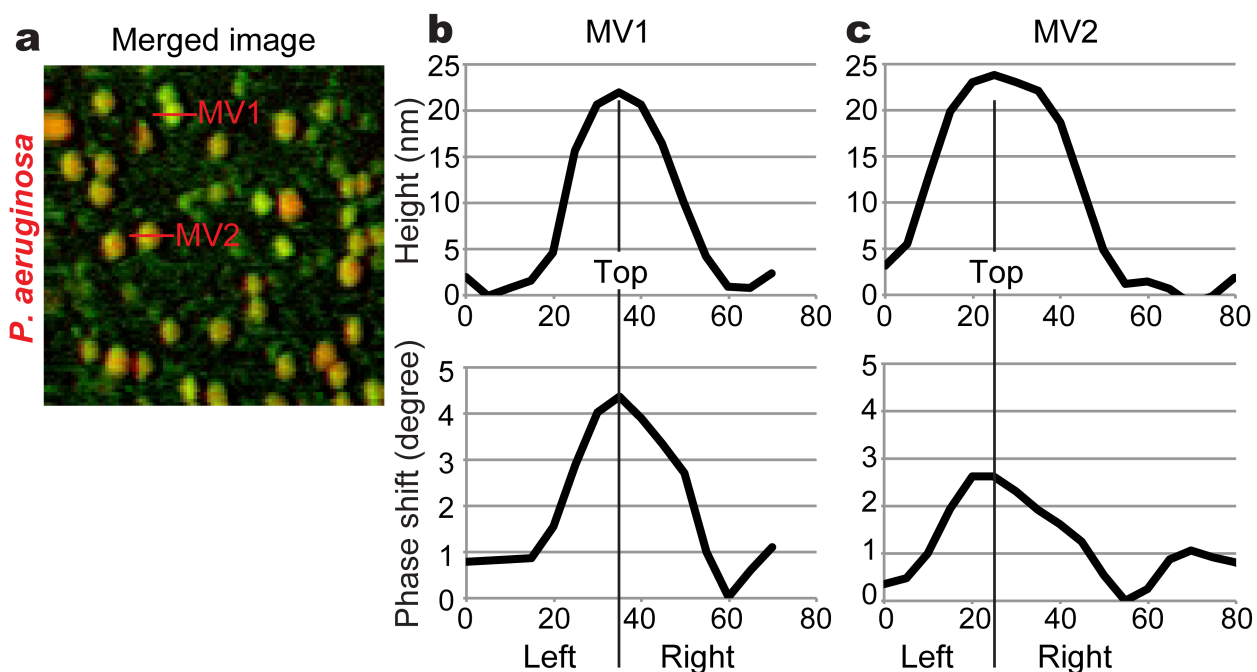

**Figure S5** Effect of parachuting on phase image. (a) The merged image of the AFM topographic and phase images from *P. aeruginosa* MVs. (b–c) Profiles of height (upper) and phase-shift (lower) along red solid lines at MV1 and MV2 in panel a. Left–right asymmetry in all profiles was caused by parachuting effect.

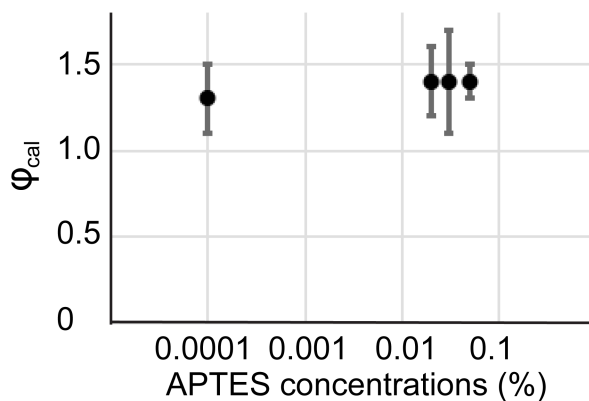

**Figure S6** Effect on  $\phi_{cal}$  of interaction between mica surface and samples.  $\phi_{cal}$  was averaged across carboxylate polybeads immobilized on the mica coated by APTES at a given concentration. Studied APTES concentrations were 0.05% ( $n = 23$ ), 0.03% ( $n = 28$ ), 0.02% ( $n = 40$ ), and 0.0001% ( $n = 30$ ). The error bars indicate standard deviation.

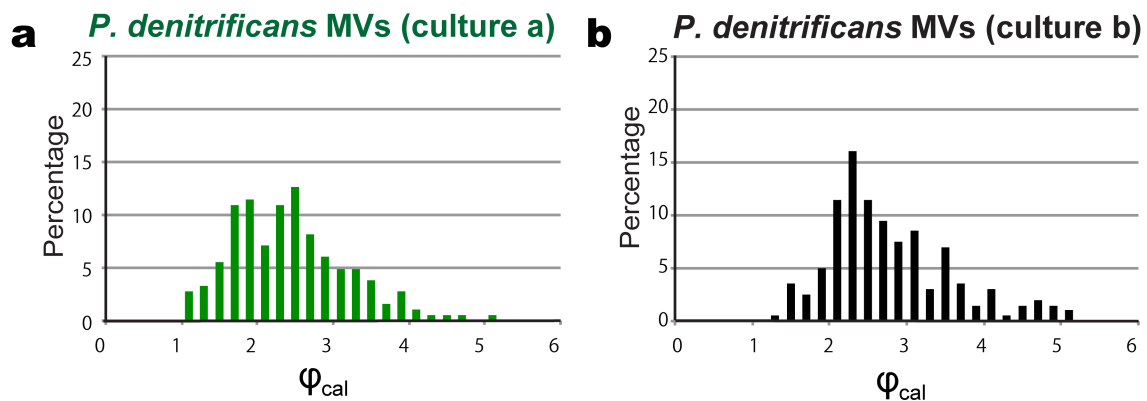

**Figure S7** Comparison of  $\phi_{cal}$  distributions of two *P. denitrificans* MV samples isolated from independent cultures. The  $\phi_{cal}$  distributions of *P. denitrificans* MVs from (a) culture a and (b) culture b exhibit no significant differences ( $\chi$ -square test  $p = 0.3$ ).
